# Supplementary material for: The 3D Genome Browser: a web-based browser for visualizing 3D genome organization and long-range chromatin interactions
Source: PubMed Central journal article supplement (PMC6172833; doi:10.1186/s13059-018-1519-9), 2018-10-04
Supplement: 13059_2018_1519_MOESM1_ESM.pdf [file 13059_2018_1519_MOESM1_ESM.pdf]

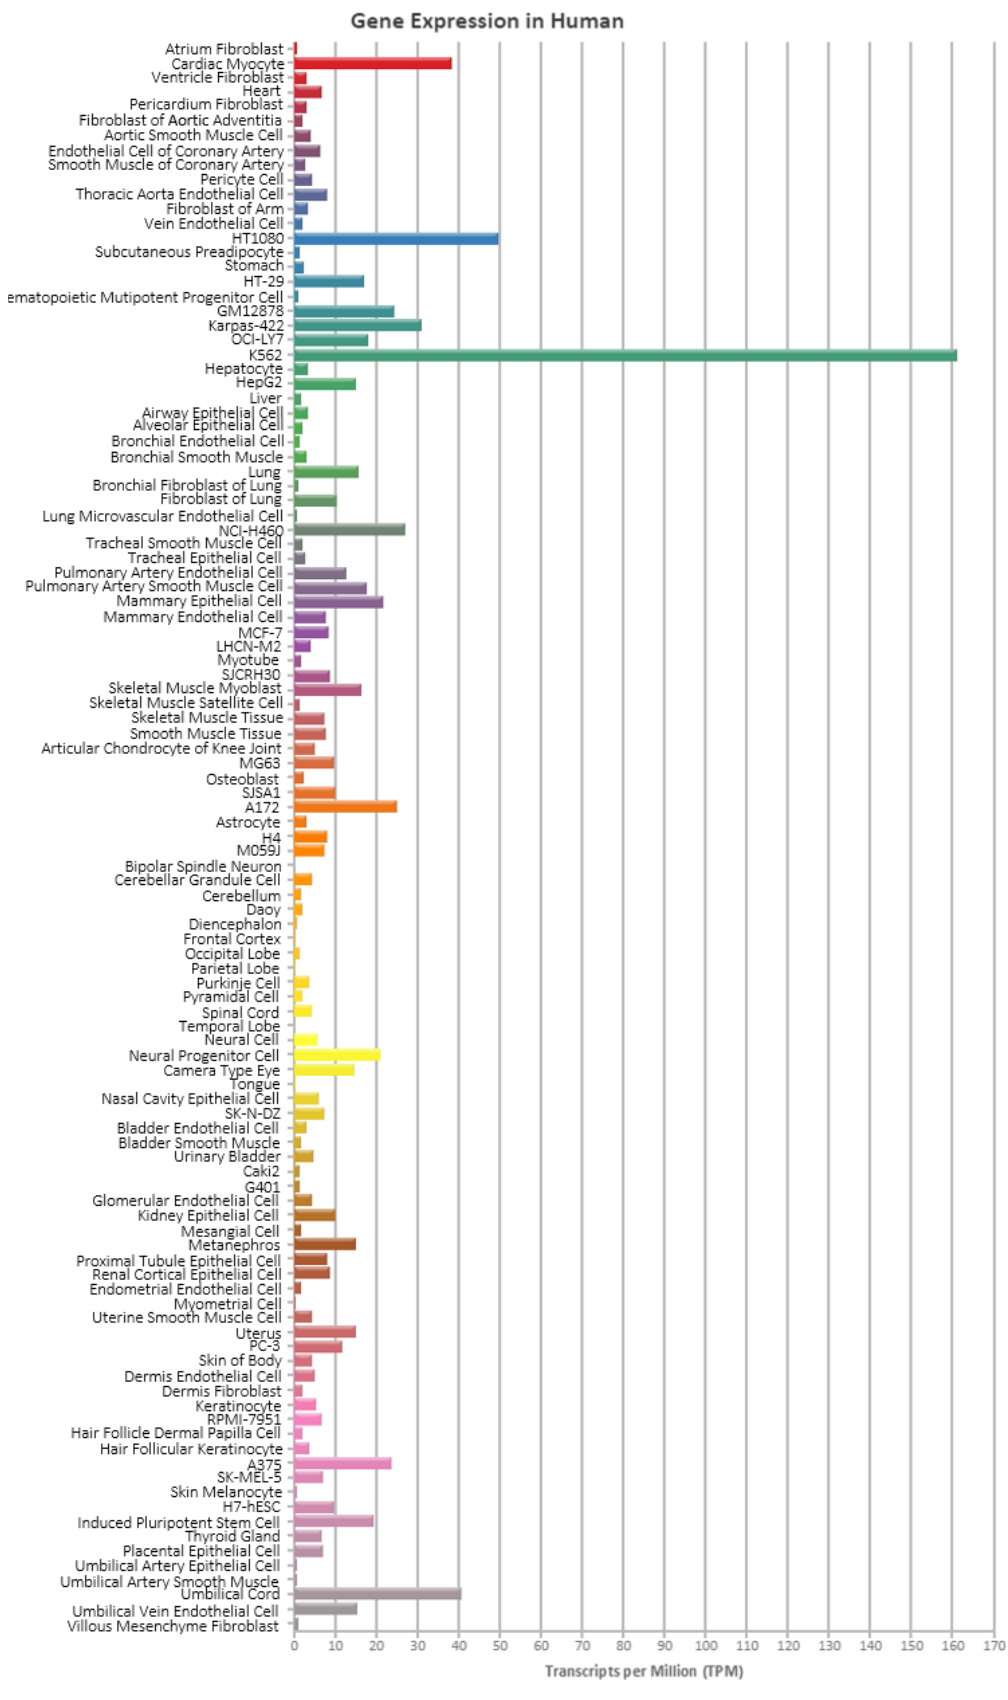

**Figure S1.** Gene expression of *SCL25A37* across 109 tissues. *SCL25A37* expression in K562 is more than three times as much compared to other 108 tissues.

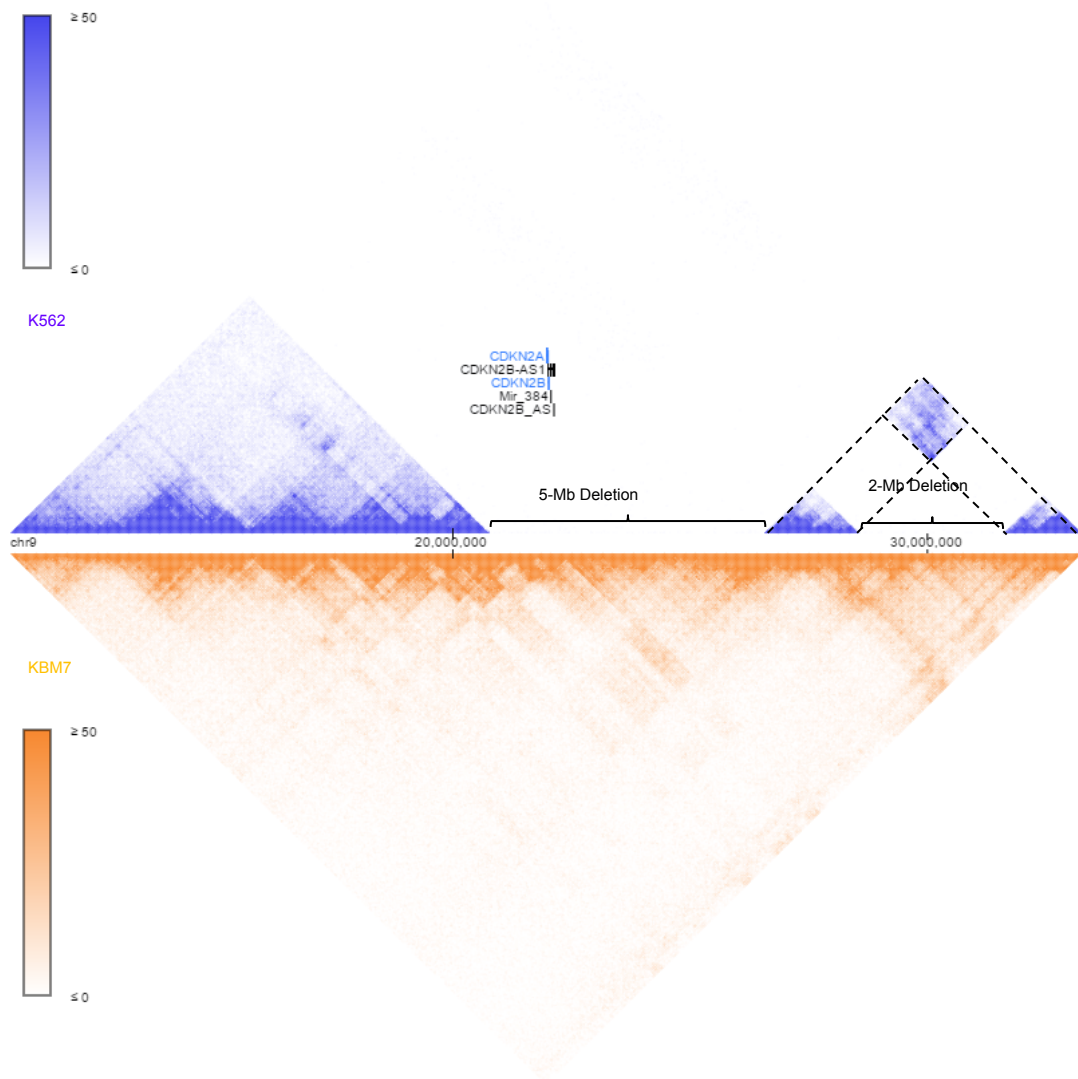

**Figure S2.** Using the 3D Genome Browser to determine intra-chromosomal structural variations. There is a large deletion encompassing CDKN2A and CDKN2B region, specific to K562 on chromosome 9.

**a**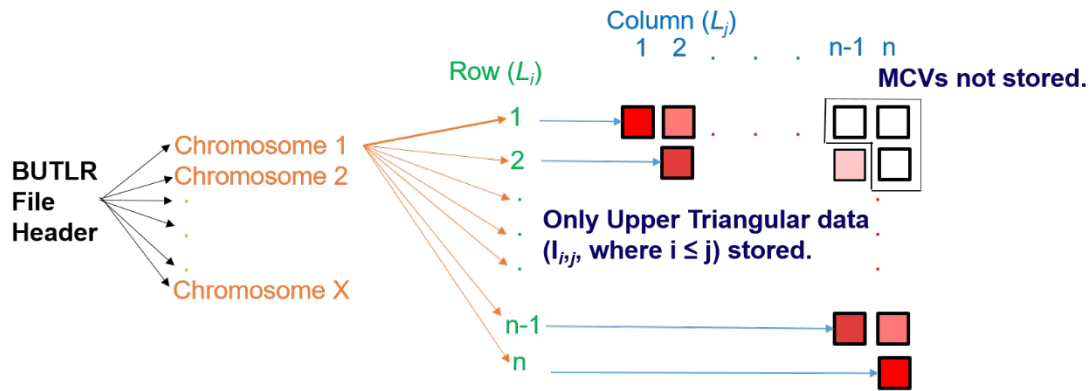**b**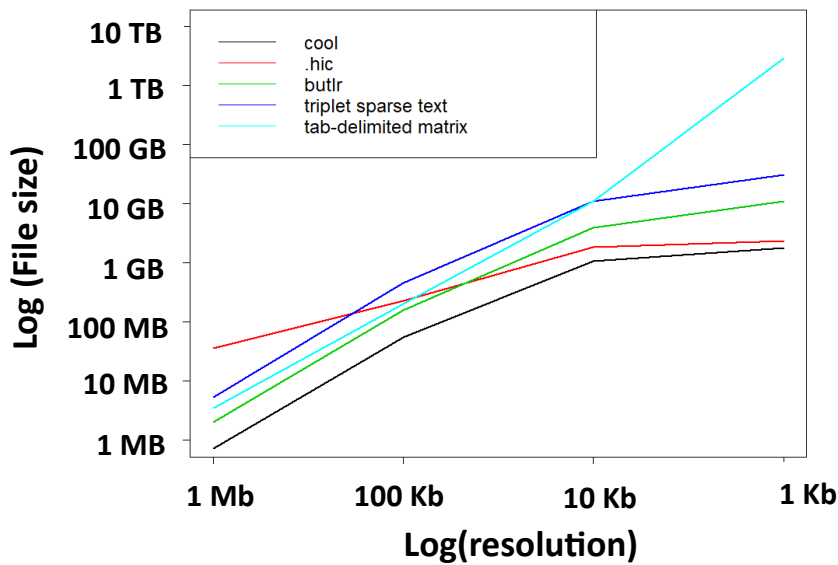

**Figure S3.** Design and performance of the BUTLR file format. **a** The BUTLR format encodes the chromosome or chromosome pairs (inter-chromosomal), row and column information as a series of pointers (represented by arrows). For purposes of compression, the most common values (MCVs) and their column locations are omitted from storage. **b** Comparing the file sizes of Hi-C matrices by BUTLR, tab-delimited matrix, .hic, cool, and triplet sparse text formats.

**Table S1. List of Hi-C datasets hosted by the 3D Genome Browser.**

| Species | Assembly         | Tissue                         | Resolution                                                    | Source                           |
|---------|------------------|--------------------------------|---------------------------------------------------------------|----------------------------------|
| Human   | hg19, hg38       | GM12878                        | 1-kb, 5-kb, 10-kb, 25-kb (hg19)<br>10-kb, 25-kb, 40-kb (hg38) | Rao et al., 2014 [24]            |
|         |                  | K562                           | 5-kb, 10-kb, 25-kb (hg19)<br>10-kb, 25-kb, 40-kb (hg38)       |                                  |
|         |                  | IMR90                          |                                                               |                                  |
|         |                  | HMEC                           |                                                               |                                  |
|         |                  | HUVEC                          |                                                               |                                  |
|         |                  | NHEK                           |                                                               |                                  |
| KBM7    |                  |                                |                                                               |                                  |
| Mouse   | mm9              | CH12                           |                                                               |                                  |
| Human   | hg19             | GM12878                        | 40-kb                                                         | Dixon et al., 2012 [5]           |
|         | hg19, hg18       | IMR90                          |                                                               |                                  |
| Mouse   | mm9              | ESC                            | 40-kb                                                         | Dixon et al., 2012 [5]           |
|         | mm9              | Cortex                         |                                                               |                                  |
| Human   | hg38             | H1-ESC                         | 10-kb, 25-kb, 40-kb                                           | Jin et al., 2013 [44]            |
|         |                  | IMR90                          |                                                               |                                  |
|         |                  | IMR90, TNF- $\alpha$ Treated   |                                                               |                                  |
| Human   | hg18, hg19, hg38 | IMR90, Flavopiridol Treated    | 40-kb (hg18, hg19)<br>10-kb, 25-kb, 40-kb (hg38)              | Dixon et al., 2015 [22]          |
|         |                  | H1-ESC                         |                                                               |                                  |
|         |                  | H1-MES                         |                                                               |                                  |
|         |                  | H1-MSC                         |                                                               |                                  |
|         |                  | H1-NPC                         |                                                               |                                  |
| Human   | hg19, hg38       | H1-TRO                         | 40-kb (hg19)<br>10-kb, 25-kb, 40-kb (hg38)                    | Leung et al., 2015 [45]          |
|         |                  | Aorta                          |                                                               |                                  |
|         |                  | Left Ventricle                 |                                                               |                                  |
|         |                  | Liver                          |                                                               |                                  |
| Human   | hg19, hg38       | Thymus                         | 40-kb (hg19)<br>10-kb, 25-kb, 40-kb (hg38)                    | Schmitt et al., 2016 [23]        |
|         |                  | Adrenal Gland                  |                                                               |                                  |
|         |                  | Bladder                        |                                                               |                                  |
|         |                  | Dorsolateral prefrontal cortex |                                                               |                                  |
|         |                  | Hippocampus                    |                                                               |                                  |
|         |                  | Lung                           |                                                               |                                  |
|         |                  | Ovary                          |                                                               |                                  |
|         |                  | Pancreas                       |                                                               |                                  |
|         |                  | Psoas Muscle                   |                                                               |                                  |
|         |                  | Right Ventricle                |                                                               |                                  |
| Spleen  |                  |                                |                                                               |                                  |
| Human   | hg19, hg38       | A549                           | 40-kb (hg19)<br>10-kb, 25-kb, 40-kb (hg38)                    | ENCODE3 (lab: Dekker)            |
|         |                  | Caki2                          |                                                               |                                  |
|         |                  | G401                           |                                                               |                                  |
|         |                  | LNCaP                          |                                                               |                                  |
|         |                  | NCIH460                        |                                                               |                                  |
|         |                  | PANCI                          |                                                               |                                  |
|         |                  | RPMI7951                       |                                                               |                                  |
|         |                  | SJCRH30                        |                                                               |                                  |
|         |                  | SKMEL5                         |                                                               |                                  |
|         |                  | SKNDZ                          |                                                               |                                  |
| SKNMC   |                  |                                |                                                               |                                  |
| Human   | hg19             | Fetal Brain (Cortical Plate)   | 10-kb                                                         | Won et al., 2016 [46]            |
|         |                  | Fetal Brain (Germinal Zone)    |                                                               |                                  |
| Mouse   | mm9              | NPC                            | 40-kb                                                         | Fraser Laboratory                |
|         |                  | Neuron                         |                                                               |                                  |
| Mouse   | mm9              | Th1                            | 40-kb                                                         | Nagano et al., 2015 [47]         |
| Human   | hg18             | GM06990                        | 1-Mb                                                          | Lieberman-Aiden et al., 2009 [8] |
|         | hg38             | GM12878                        | 10-kb, 25-kb, 40-kb                                           |                                  |
| Mouse   | Mm10             | F123_ES                        | 40-kb                                                         | Hardison Laboratory              |

|              |      |                                        |                     |                            |
|--------------|------|----------------------------------------|---------------------|----------------------------|
|              |      | G1E-ER4                                |                     |                            |
|              |      | HPC7                                   |                     |                            |
| <b>Human</b> | hg38 | Primary_Epidermal_Keratinocyte at day0 | 10-kb, 25-kb, 40-kb | Rubin et al., 2017 [48]    |
|              |      | Primary_Epidermal_Keratinocyte at day3 |                     |                            |
|              |      | Primary_Epidermal_Keratinocyte at day6 |                     |                            |
| <b>Human</b> | hg38 | HCT-116_RAD21-mAC                      | 10-kb, 25-kb, 40-kb | Rao et al., 2017 [49]      |
|              |      | HCT-116_RAD21-mAC with auxin treatment |                     |                            |
| <b>Human</b> | hg38 | THP-1                                  | 10-kb, 25-kb, 40-kb | Phanstiel et al, 2017 [50] |
|              |      | THP-1 with PMA treatment               |                     |                            |
| <b>Mouse</b> | mm10 | Neuron                                 | 10-kb, 25-kb, 40-kb | Jiang et al., 2017 [51]    |
|              |      | Neuron_Setdb1_KnockOut                 |                     |                            |
| <b>Mouse</b> | mm10 | ESC                                    | 10-kb, 25-kb, 40-kb | Bonev et al., 2017 [52]    |
|              |      | NPC                                    |                     |                            |
|              |      | Cortical Neuron                        |                     |                            |
| <b>Mouse</b> | mm10 | Myoblast                               | 10-kb, 25-kb, 40-kb | Doynova et al., 2017 [53]  |

**Table S2. List of ChIA-PET, Capture Hi-C, PLAC-Seq and HiChIP datasets.**

| Species | Method              | Tissue                 | Enrichment Target | Source                     |
|---------|---------------------|------------------------|-------------------|----------------------------|
| Human   | ChIA-PET            | K562                   | CTCF              | ENCODE2 (lab: Ruan)        |
|         |                     |                        | H3K4me1           | ENCODE3 (lab: Snyder)      |
|         |                     |                        | H3K4me2           | ENCODE3 (lab: Snyder)      |
|         |                     |                        | H3K4me3           | ENCODE3 (lab: Snyder)      |
|         |                     |                        | H3K27ac           | ENCODE3 (lab: Snyder)      |
|         |                     |                        | POLR2A            | ENCODE2 (lab: Ruan)        |
|         |                     |                        | RAD21             | ENCODE3 (lab: Snyder)      |
|         |                     | HCT116                 | POLR2A            | ENCODE2 (lab: Ruan)        |
|         |                     | MCF-7                  | CTCF              | ENCODE2 (lab: Ruan)        |
|         |                     |                        | ESR1              | ENCODE2 (lab: Ruan)        |
| POLR2A  | ENCODE2 (lab: Ruan) |                        |                   |                            |
| GM12878 | RAD21               | ENCODE3 (lab: Snyder)  |                   |                            |
| NB4     | POLR2A              | ENCODE2 (lab: Ruan)    |                   |                            |
| HeLa-S3 | POLR2A              | ENCODE2 (lab: Ruan)    |                   |                            |
| Human   | HiChIP              | GM12878                | Cohesin           | Mumbach et al., 2016 [13]  |
| Mouse   |                     | ESC                    | Cohesin           |                            |
| Mouse   | PLAC-Seq            | ESC                    | H3K4me3           | Fang et al., 2016 [12]     |
|         |                     |                        | H3K27ac           |                            |
|         |                     |                        | POL2              |                            |
| Human   | Capture Hi-C        | B Naïve                | Promoter          | Javierre et al., 2016 [27] |
|         |                     | B Total                |                   |                            |
|         |                     | CD4 Activated          |                   |                            |
|         |                     | CD4 Naïve              |                   |                            |
|         |                     | CD4 Total              |                   |                            |
|         |                     | CD4 Nonactivated       |                   |                            |
|         |                     | CD8 Naïve              |                   |                            |
|         |                     | CD8 Total              |                   |                            |
|         |                     | Endothelial Precursors |                   |                            |
|         |                     | Erythroblasts          |                   |                            |
|         |                     | Fetal Thymus           |                   |                            |
|         |                     | Macrophages M0         |                   |                            |
|         |                     | Macrophages M1         |                   |                            |

|  |  |                |  |                          |
|--|--|----------------|--|--------------------------|
|  |  | Macrophages M2 |  |                          |
|  |  | Megakaryocytes |  |                          |
|  |  | Monocytes      |  |                          |
|  |  | Neutrophils    |  |                          |
|  |  | CD34           |  |                          |
|  |  | GM12878        |  | Mifsud et al., 2015 [11] |

**Table S3. List of GAM, DNase Hi-C, and SPRITE datasets.**

| Species | Assembly | Tissue  | Resolution                                 | Source                     |
|---------|----------|---------|--------------------------------------------|----------------------------|
| Mouse   | mm9      | ESC     | 1-Mb, 30-kb                                | Beagrie et al., 2018 [19]  |
| Human   | hg19     | K562    | 1-Mb                                       | Ma et al., 2015 [54]       |
|         |          | H1-ESC  |                                            |                            |
| Human   | hg19     | GM12878 | 25-kb, 50kb, 250kb, 1-Mb                   | Quinodoz et al., 2018 [20] |
| Mouse   | mm9      | ESC     | 20-kb, 40-kb, 100-kb, 200-kb, 400-kb, 1-Mb |                            |
